# Supplementary material
Source: publisher figshare collection journal article supplement (https://diabetesjournals.figshare.com/articles/dataset/_/14618292)
Supplement: Supplementary file 1 [file 1]

## SUPPLEMENTARY TABLE 1

| <b>Functional ROI</b>          | <b>x</b> | <b>y</b> | <b>z</b> |
|--------------------------------|----------|----------|----------|
| Right Caudate                  | 12       | 14       | 10       |
| Left Caudate                   | -14      | 12       | 11       |
| Right Nucleus Accumbens        | 8        | 11       | -7       |
| Left Nucleus Accumbens         | -10      | 14       | -6       |
| Right Putamen                  | 24       | 7        | -6       |
| Left Putamen                   | -25      | 6        | -6       |
| Right Amygdala                 | 18       | -4       | -25      |
| Left Amygdala                  | -26      | -4       | -21      |
| Orbitofrontal cortex           | 1        | 44       | -14      |
| Ventromedial prefrontal cortex | -2       | 52       | -8       |
| Right Hippocampus              | 26       | -17      | -16      |
| Left Hippocampus               | -22      | -14      | -28      |
| Right Insula                   | 33       | 22       | 0        |
| Left Insula                    | -34      | 24       | 0        |
| Paracingulate gyrus            | 1        | 28       | 40       |
| Right Middle frontal gyrus     | 28       | 0        | 54       |
| Left Middle frontal gyrus      | -30      | 0        | 54       |
| Right Parietal lobule          | 34       | -82      | -8       |
| Left Parietal lobule           | -25      | -87      | -8       |

**Supplementary Table 1.** Table of MNI co-ordinates for the functional ROIs pertaining to the Reward System and Executive Control System, ascertained from the whole group brain activation responses to visual food cues (both visits combined).

## SUPPLEMENTARY TABLE 2

|                                                              | <b>Roux-en-Y<br/>Gastric Bypass<br/>(RYGB)</b> | <b>Very Low-<br/>Calorie Diet<br/>(VLCD)</b> | <b>P-value<br/>between<br/>treatment<br/>groups</b> |
|--------------------------------------------------------------|------------------------------------------------|----------------------------------------------|-----------------------------------------------------|
| <b>N</b>                                                     | <b>7</b>                                       | <b>7</b>                                     |                                                     |
| <b>Female: Male</b>                                          | <b>6: 1</b>                                    | <b>4: 3</b>                                  | <b>0.56</b>                                         |
| <b>Age (years)</b>                                           | <b>51.14 ± 4.15</b>                            | <b>44.71 ± 4.69</b>                          | <b>0.33</b>                                         |
| <b>Weight at baseline (VISIT 1) (kg)</b>                     | <b>113.63 ± 9.44</b>                           | <b>106.44 ± 8.59</b>                         | <b>0.58</b>                                         |
| <b>Weight with intervention at VISIT 2 (kg)</b>              | <b>105.39 ± 9.20</b>                           | <b>98.24 ± 8.37</b>                          | <b>0.58</b>                                         |
| <b>Weight loss between fMRI scans (VISIT 2-VISIT 1) (kg)</b> | <b>-8.24 ± 0.69</b>                            | <b>-8.20 ± 0.67</b>                          | <b>0.97</b>                                         |
| <b>Percentage weight loss between fMRI scans (%)</b>         | <b>-7.46 ± 0.75</b>                            | <b>-7.84 ± 0.62</b>                          | <b>0.70</b>                                         |
| <b>Follow up weight one year after study entry (kg)</b>      | <b>80.81 ± 5.91</b>                            | <b>108.85 ± 11.38</b>                        | <b>0.043</b>                                        |
| <b>HbA1c at VISIT 1 (mmol/mol)</b>                           | <b>49.29 ± 3.61</b>                            | <b>57.86 ± 4.44</b>                          | <b>0.16</b>                                         |
| <b>HbA1c at VISIT 2 (mmol/mol)</b>                           | <b>44.00 ± 2.12</b>                            | <b>51.43 ± 4.10</b>                          | <b>0.13</b>                                         |
| <b>Fasting glucose at VISIT 1 (mmol/L)</b>                   | <b>8.07 ± 0.80</b>                             | <b>8.89 ± 1.39</b>                           | <b>0.62</b>                                         |
| <b>Fasting glucose at VISIT 2 (mmol/L)</b>                   | <b>5.94 ± 0.28</b>                             | <b>6.67 ± 0.45</b>                           | <b>0.059</b>                                        |
| <b>Δ Fasting glucose (mmol/L)</b>                            | <b>-2.14 ± 0.69</b>                            | <b>-2.22 ± 1.22</b>                          | <b>0.95</b>                                         |
| <b>Fasting insulin at VISIT 1 (mIU/L)</b>                    | <b>20.09 ± 3.25</b>                            | <b>15.91 ± 1.53</b>                          | <b>0.27</b>                                         |
| <b>Fasting insulin at VISIT 2 (mIU/L)</b>                    | <b>12.18 ± 1.70</b>                            | <b>10.35 ± 1.14</b>                          | <b>0.39</b>                                         |
| <b>Δ Fasting insulin (mIU/L)</b>                             | <b>-7.91 ± 3.68</b>                            | <b>-5.56 ± 2.39</b>                          | <b>0.60</b>                                         |
| <b>Treatment for diabetes prior to the study</b>             | <b>Diet:3<br/>Metformin:4</b>                  | <b>Diet:1<br/>Metformin:6</b>                | <b>0.56</b>                                         |

**Supplementary Table 2.** Demographic and clinical characteristics of a subgroup of patients who had RYGB (N=7) and weight matched patients who had VLCD (n=7). Both study groups at baseline (VISIT 1) and at the end of the intervention (VISIT 2) are shown. Continuous variables (checked for normality of distribution) are shown as means ± SEM. *P*-values represent the results of unpaired t-tests between the RYGB and VLCD treated groups. Categorical variables were analysed using Fisher's exact test.

### SUPPLEMENTARY TABLE 3

|      |         | Hippocampus    |                 | Caudate        |                 | Insula         |                 | Amygdala       |                 | Nucleus Accumbens |                 |
|------|---------|----------------|-----------------|----------------|-----------------|----------------|-----------------|----------------|-----------------|-------------------|-----------------|
|      |         | Pearson $\rho$ | <i>P</i> -value | Pearson $\rho$    | <i>P</i> -value |
| RYGB | Ghrelin | -0.086         | 0.76            | 0.084          | 0.77            | -0.283         | 0.31            | 0.069          | 0.81            | -0.072            | 0.8             |
|      | GLP-1   | 0.002          | 0.996           | 0.079          | 0.79            | -0.019         | 0.95            | 0.033          | 0.91            | 0.244             | 0.38            |
|      | PYY     | -0.209         | 0.46            | -0.130         | 0.64            | -0.067         | 0.81            | -0.096         | 0.73            | -0.324            | 0.24            |
|      | GIP     | -0.389         | 0.15            | -0.472         | 0.08            | -0.360         | 0.19            | -0.328         | 0.23            | -0.383            | 0.16            |
| VLCD | Ghrelin | 0.303          | 0.21            | 0.061          | 0.81            | -0.072         | 0.77            | 0.063          | 0.80            | -0.126            | 0.61            |
|      | GLP-1   | -0.173         | 0.52            | -0.271         | 0.31            | -0.123         | 0.65            | 0.152          | 0.57            | -0.151            | 0.58            |
|      | PYY     | -0.125         | 0.64            | -0.332         | 0.21            | -0.073         | 0.79            | -0.142         | 0.60            | -0.156            | 0.56            |
|      | GIP     | 0.068          | 0.78            | -0.104         | 0.67            | -0.188         | 0.44            | 0.123          | 0.62            | 0.065             | 0.79            |

**Supplementary Table 3.** Correlation between changes in gut hormone levels and reward ROI activity following RYGB and VLCD
